# Supplementary material for: Graphene-based surface modification on layered Li-rich cathode for high-performance Li-ion batteries
Source: Royal Society of Chemistry journal article supplement (doi:10.1039/c3ta11580a), 2013-01-01
Supplement: c3ta11580a.pdf [file c3ta11580a.pdf]

## Supporting Information

### **Graphene-based surface modification on layered Li-rich cathode for high-performance Li-ion batteries**

*Bohang Song,<sup>1</sup> Man On Lai,<sup>1</sup> Zongwen Liu,<sup>2</sup> Hongwei Liu<sup>2</sup> and Li Lu\*<sup>1</sup>*

<sup>1</sup> Materials Science Laboratory, Department of Mechanical Engineering, National University of Singapore, 117576, Singapore.

<sup>2</sup> School of Chemical and Biomolecular Engineering, The University of Sydney, Sydney, Australia.

E-mail: luli@nus.edu.sg

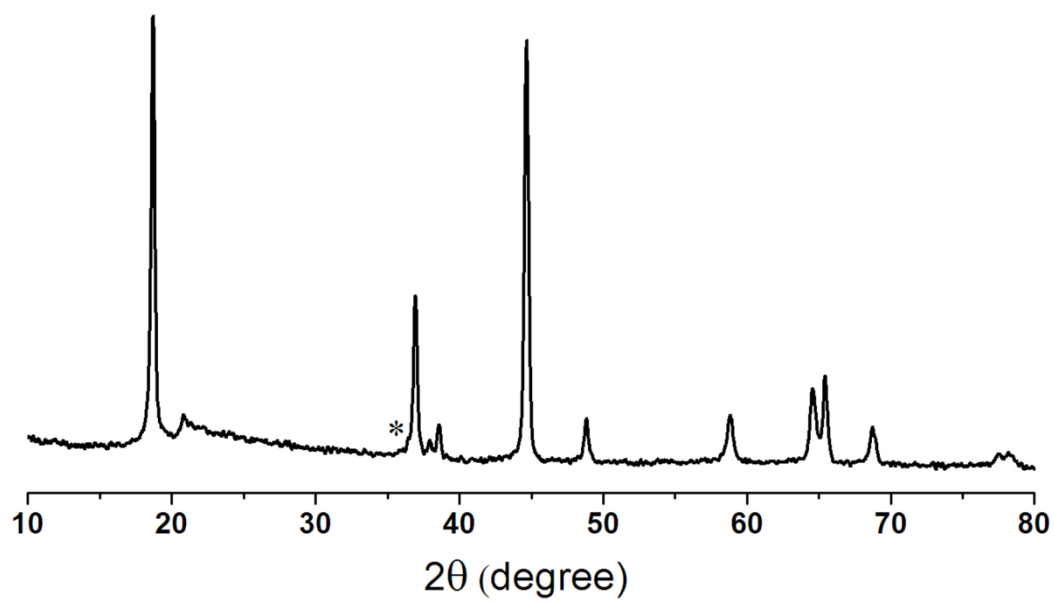

**Figure S1.** XRD pattern of LLNCM/LAA-350 sample including a spinel-like phase labeled as \*.

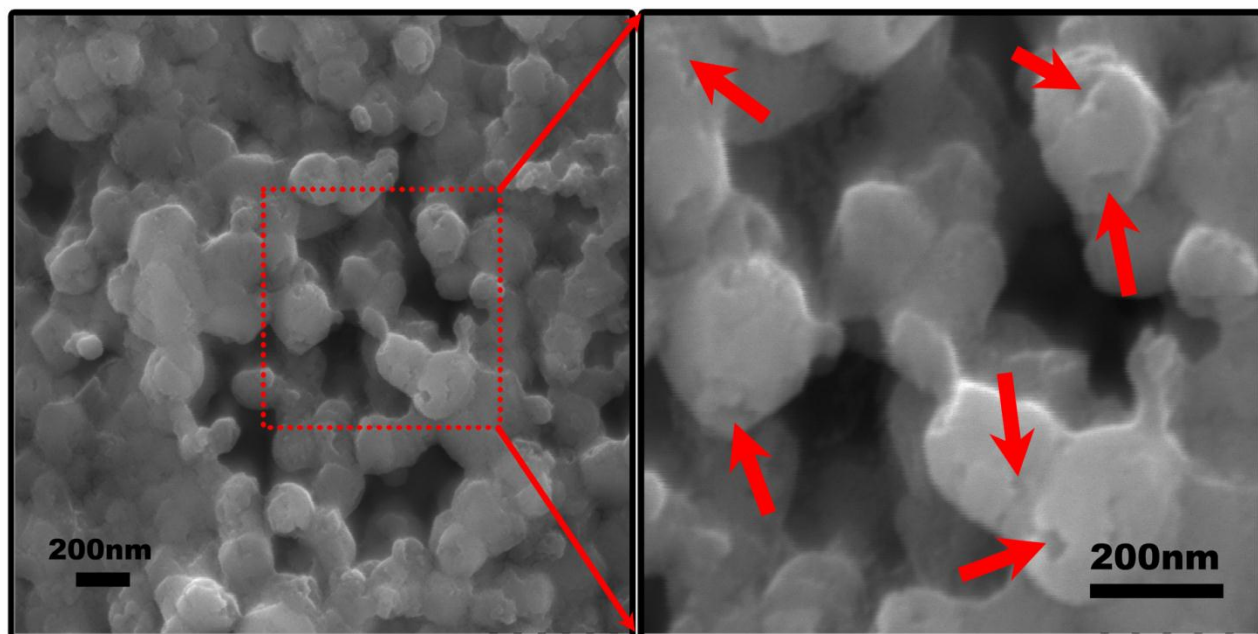

**Figure S2.** SEM images of LLNCM/LAA-350 powders in which the arrows indicate the collapse regions of particle surfaces after LAA and the following 350 °C heat treatment.

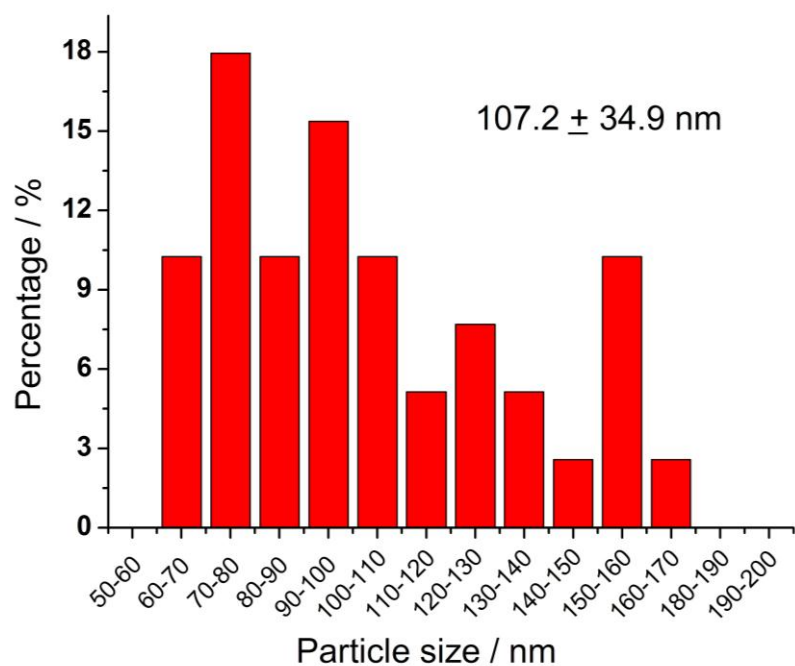

**Figure S3.** Particle size distributions of bare  $\text{Li}(\text{Li}_{0.2}\text{Mn}_{0.54}\text{Ni}_{0.13}\text{Co}_{0.13})\text{O}_2$ .

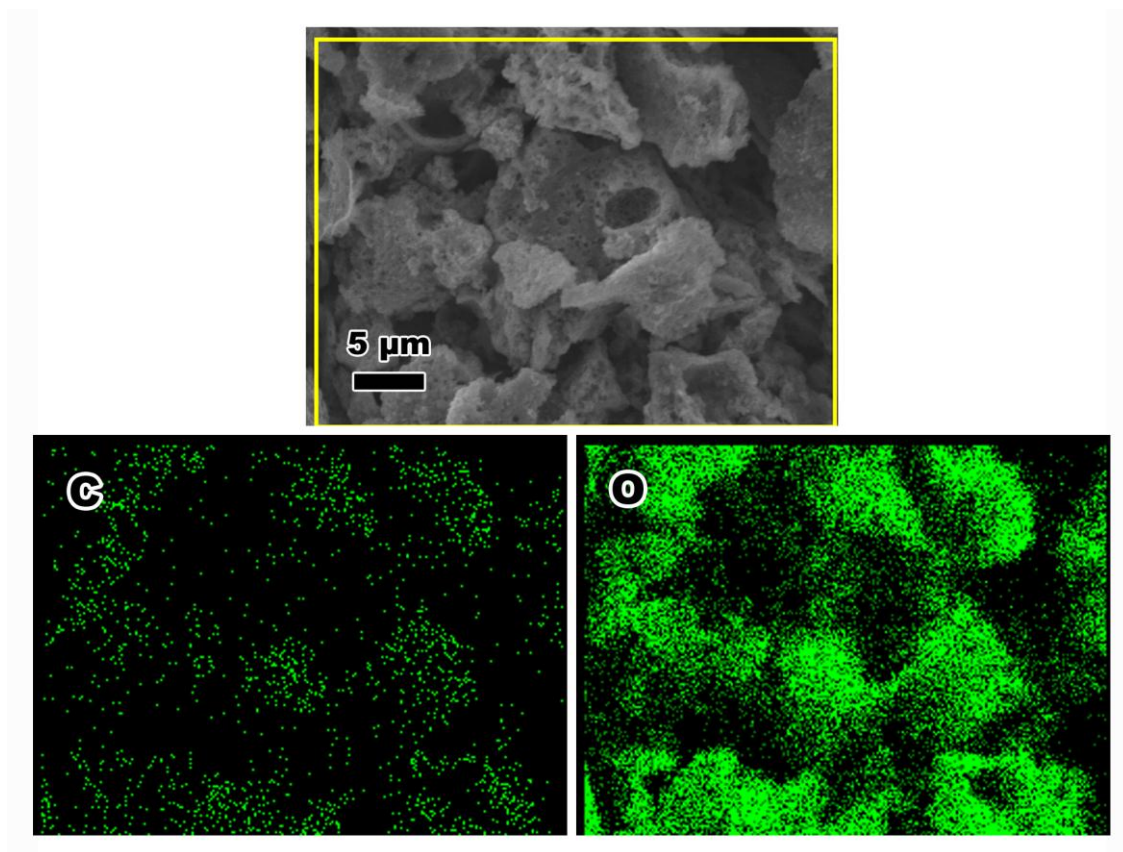

**Figure S4.** SEM image and corresponding carbon and oxygen elemental mapping of LNCMO/GO composite.

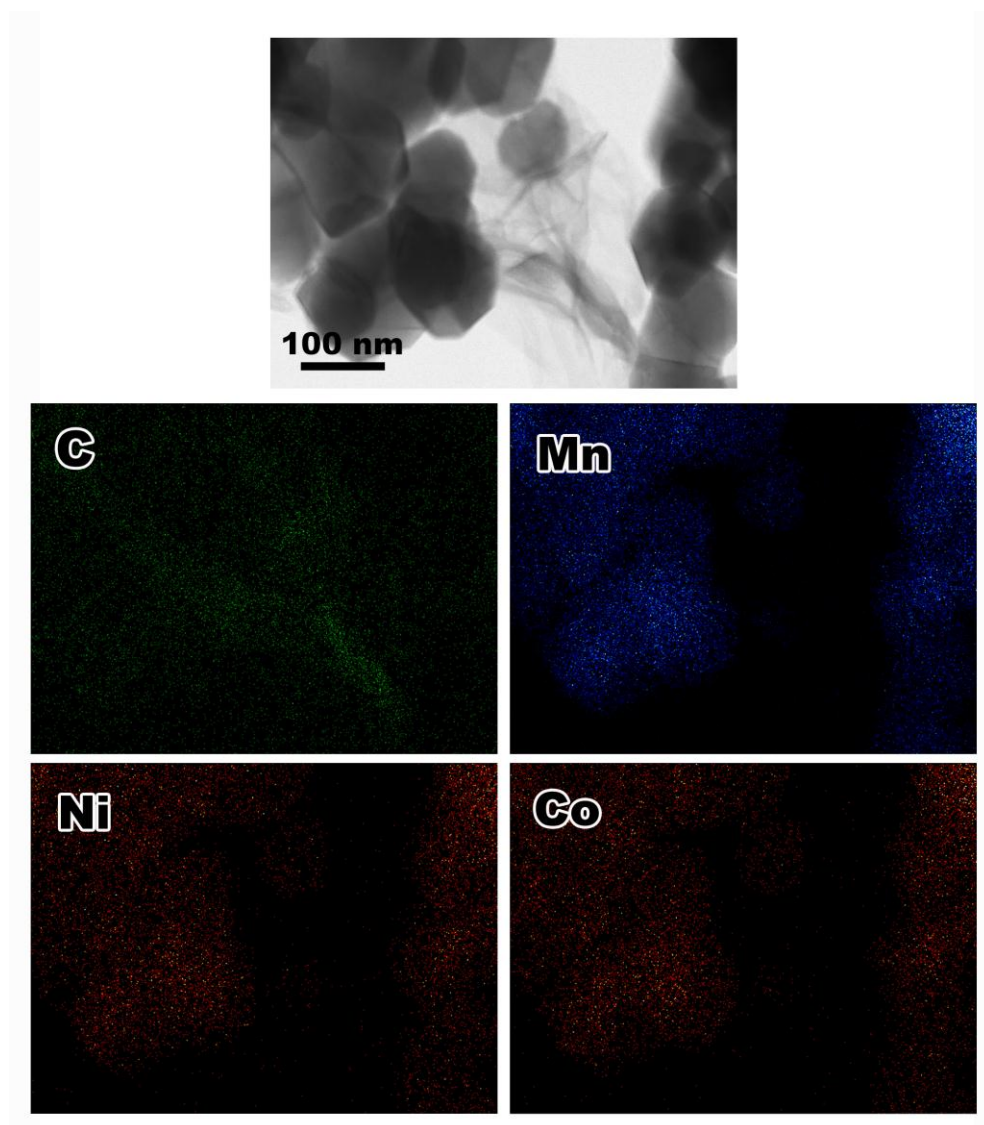

**Figure S5.** TEM image and corresponding carbon, manganese, nickel and cobalt elemental mapping of LLNCM/GO composite.

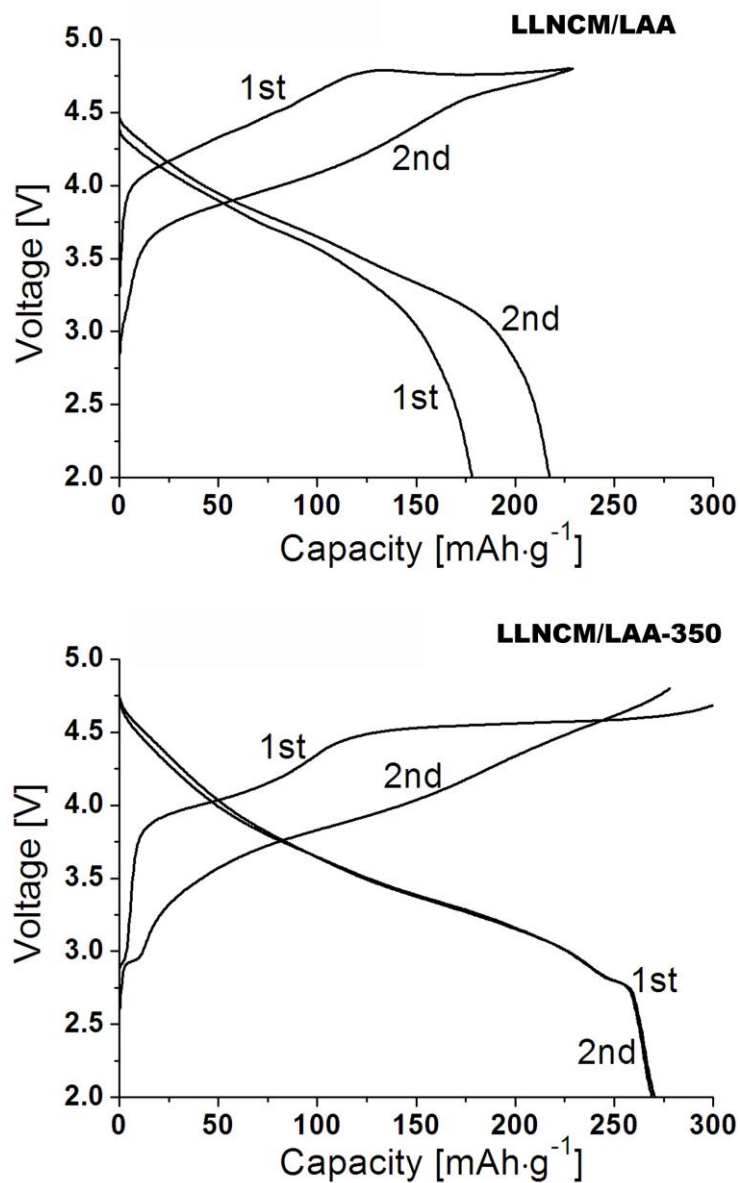

**Figure S6.** First and second charge/discharge curves of LLNCM/LAA and LLNCM/LAA-350 samples cycled between 2.0 and 4.8 V at 50 mA·g<sup>-1</sup> (0.2 C).

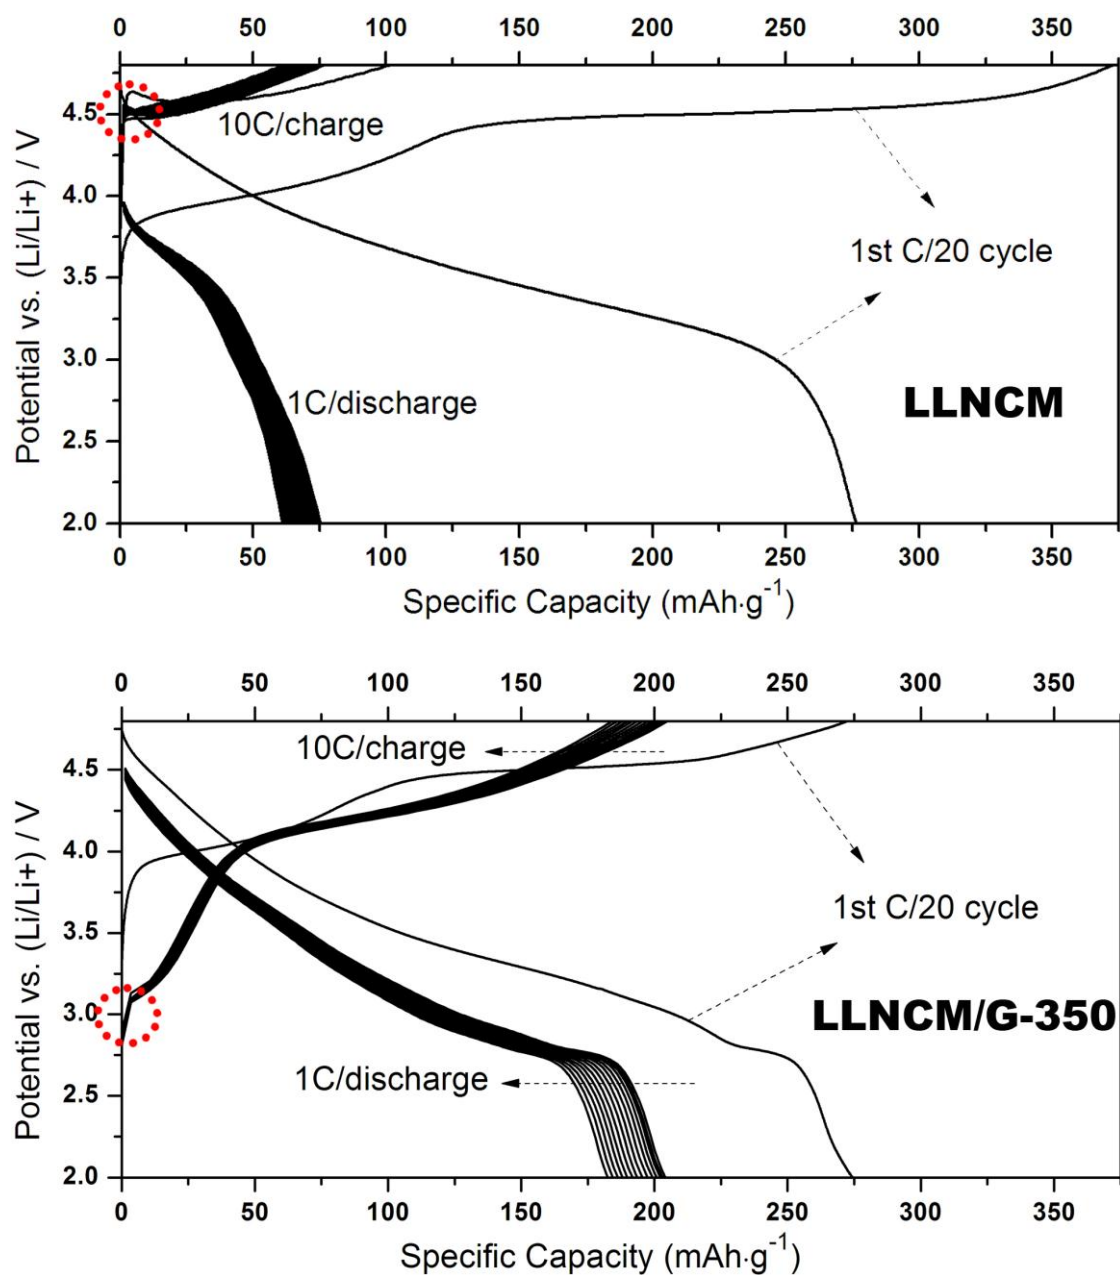

**Figure S7.** 10C-charge/1C-discharge curves after a first forming cycle of LLNCM/G-350 and LLNCM samples cycled between 2.0 and 4.8 V where 1 C corresponds to 250 mA·g<sup>-1</sup>. The red dot cycles indicate the various polarization effects caused by the high charging rate of 10 C.



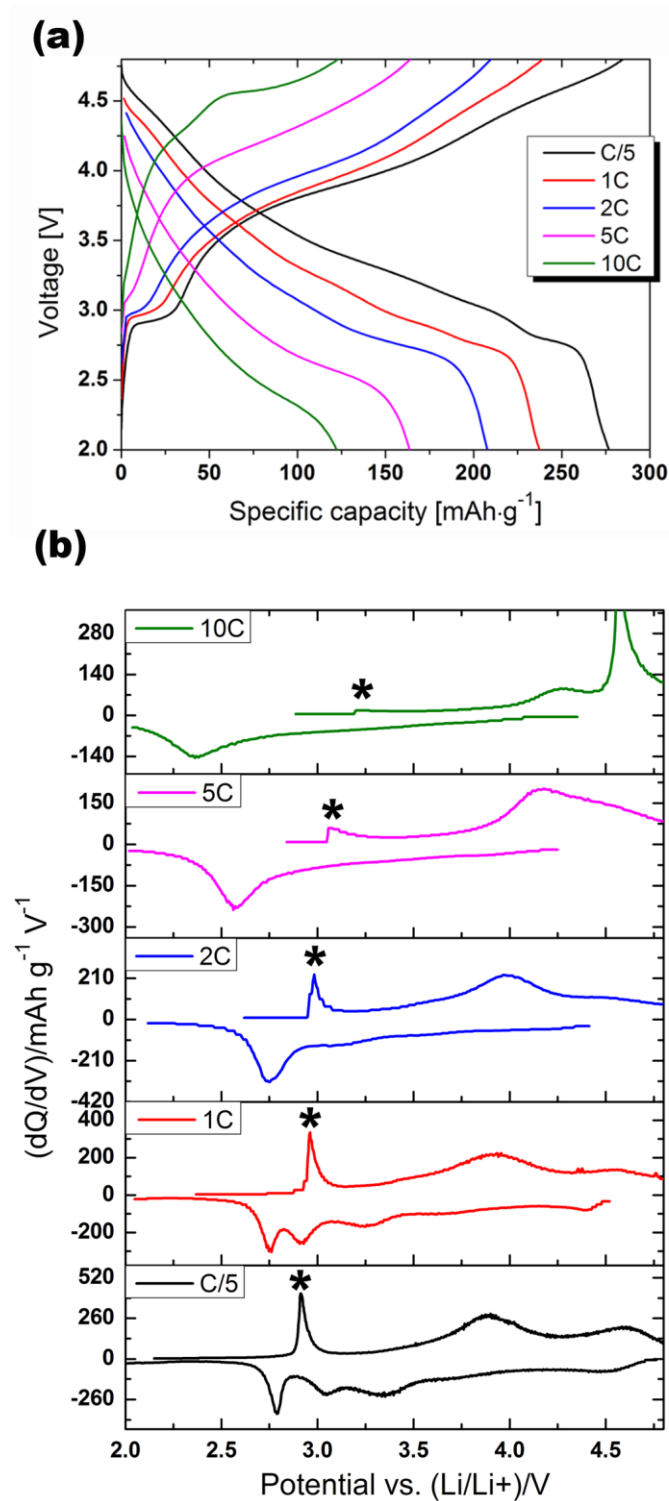

**Figure S8.** Charge/discharge curves (a) and corresponding  $dQ/dV$  plots (b) of LLNCM/G-350 sample obtained from the same testing of Fig. 9 (d). Symbol \* indicates the charging peaks resulted from the Li reinsertion into surface-spinel framework.

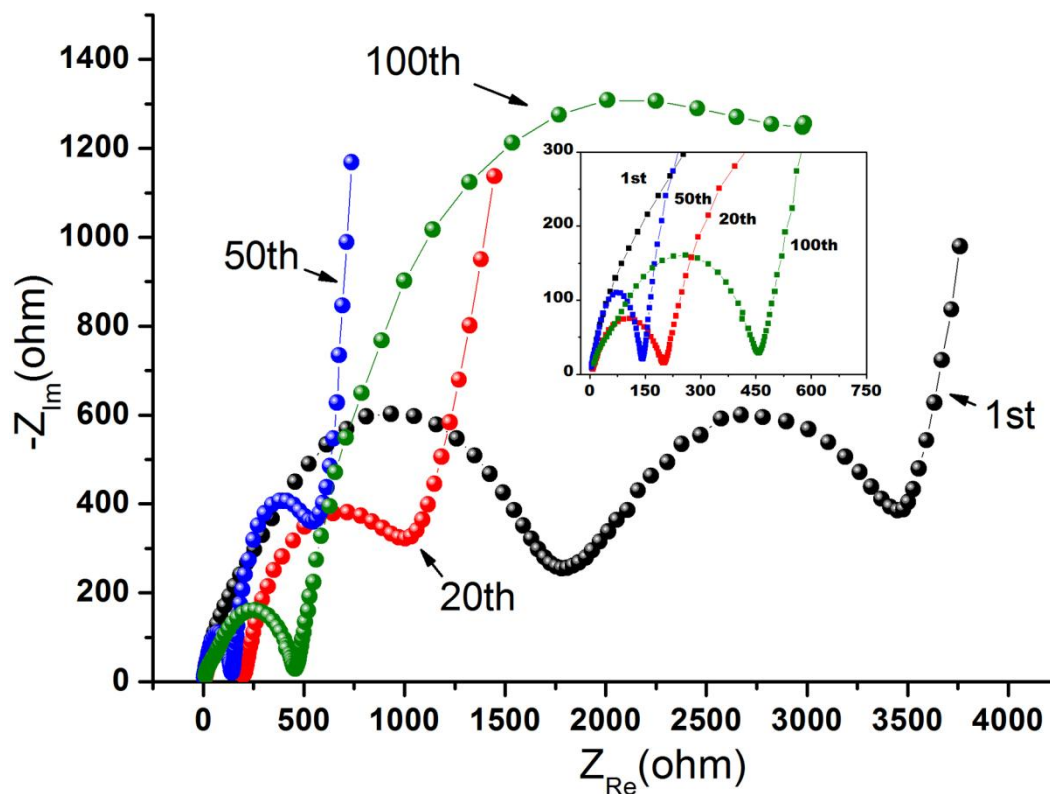

**Figure S9.** EIS spectra of cycled LLNCM/GO cathode material at 1<sup>st</sup>, 20<sup>th</sup>, 50<sup>th</sup> and 100<sup>th</sup> cycles. Before the EIS measurement, the half cell was charged to the cutoff voltage of 4.8 V, then discharged to 3.5 V at 0.05 C, and held at 3.5 V for another 3 h. In between of two individual cycles, 2 C current density was used to cycle the half cell where 1 C stands for 250 mA·g<sup>-1</sup>.

**Table S1.** Surface quantification of chemical composition for LLNCM, LLNCM/GO, LLNCM/G-250 and LLNCM/G-350 samples, as analyzed from XPS results.

|             | Li          | Transition metals |      |      |             | O   |
|-------------|-------------|-------------------|------|------|-------------|-----|
|             |             | Mn                | Ni   | Co   | Total       |     |
| LLNCM       | <b>1.01</b> | 0.53              | 0.23 | 0.23 | <b>0.99</b> | 2.8 |
| LLNCM/GO    | <b>0.76</b> | 0.68              | 0.34 | 0.22 | <b>1.24</b> | 5.3 |
| LLNCM/G-250 | <b>0.66</b> | 0.94              | 0.25 | 0.16 | <b>1.35</b> | 3.1 |
| LLNCM/G-350 | <b>0.64</b> | 1.1               | 0.15 | 0.13 | <b>1.38</b> | 3.4 |

**Table S2.** Charge/discharge capacities at various cycling states of LLNCM, LLNCM/GO, LLNCM/G-250 and LLNCM/G-350 cathodes, which were cycled between 2.0 and 4.8 V at 50 mA·g<sup>-1</sup>.

| Sample      | 1 <sup>st</sup> cycle (mAh·g <sup>-1</sup> ) |           | 3 <sup>rd</sup> cycle (mAh·g <sup>-1</sup> ) |           | 5 <sup>th</sup> cycle (mAh·g <sup>-1</sup> ) |           | 20 <sup>th</sup> cycle (mAh·g <sup>-1</sup> ) |           | 50 <sup>th</sup> cycle (mAh·g <sup>-1</sup> ) |           |
|-------------|----------------------------------------------|-----------|----------------------------------------------|-----------|----------------------------------------------|-----------|-----------------------------------------------|-----------|-----------------------------------------------|-----------|
|             | charge                                       | discharge | charge                                       | discharge | charge                                       | discharge | charge                                        | discharge | charge                                        | discharge |
| LLNCM       | 300                                          | 253       | 247                                          | 243       | 247                                          | 243       | 217                                           | 216       | 181                                           | 181       |
| LLNCM/GO    | 263                                          | 238       | 250                                          | 244       | 241                                          | 237       | 203                                           | 201       | 191                                           | 189       |
| LLNCM/G-250 | 261                                          | 262       | 262                                          | 257       | 257                                          | 252       | 232                                           | 229       | 197                                           | 194       |
| LLNCM/G-350 | 260                                          | 268       | 270                                          | 264       | 266                                          | 260       | 240                                           | 236       | 206                                           | 203       |
